# Supplementary material for: Photocatalytic Efficacy of Heterocyclic Base Grafted Chitosan Magnetite Nanoparticles on Sorption of Pb(II); Application on Mining Effluent
Source: MDPI journal article supplement (doi:10.3390/catal12030330), 2022-03-14
Supplement: s1 [file s1]

## Article

# Photocatalytic Efficacy of Heterocyclic Base Grafted Chitosan Magnetite Nanoparticles on Sorption of Pb(II); Application on Mining Effluent

Mohammed F. Hamza <sup>1,2,\*</sup>, Adel E.-S. Goda <sup>3</sup>, Shunyan Ning <sup>2</sup>, Hamed I. Mira <sup>2</sup>, Adel A.-H. Abdel-Rahman <sup>4</sup>, Yuezhou Wei <sup>1,5,\*</sup>, Toyohisa Fujita <sup>6,7</sup>, Hamada H. Amer <sup>8</sup>, Saad H. Alotaibi <sup>8</sup> and Amr Fouda <sup>9</sup>

<sup>1</sup> School of Nuclear Science and Technology, University of South China, Hengyang 421001, China

<sup>2</sup> Nuclear Materials Authority, POB 530, El-Maadi, Cairo 11728, Egypt; ningshunyan@usc.edu.cn (S.N.); hamedmira@yahoo.com (H.I.M.)

<sup>3</sup> Tanta Higher Institute of Engineering and Technology, Tanta 31739, Egypt; adelgoda1969@gmail.com

<sup>4</sup> Chemistry Department, Faculty of Science, Menofia University, Shebin El-Kom 32511, Egypt; adelnassar63@yahoo.com

<sup>5</sup> School of Nuclear Science and Engineering, Shanghai Jiao Tong University, Shanghai 200240, China

<sup>6</sup> School of Resources, Environment and Materials, Guangxi University, Nanning 530004, China; fujitatoyohisa@gxu.edu.cn

<sup>7</sup> School of Chemistry and Chemical Engineering, Guangxi University, Nanning 530004, China

<sup>8</sup> Department of Chemistry, Turabah University College, Taif University, Taif 21944, Saudi Arabia; h.amer@tu.edu.sa (H.H.A.); s.alosaimi@tu.edu.sa (S.H.A.)

<sup>9</sup> Botany and Microbiology Department, Faculty of Science, Al-Azhar University, Cairo 11884, Egypt; amr\_fh83@azhar.edu.eg

\* Correspondence: m\_fouda21@hotmail.com (M.F.H.); yzwei@sjtu.edu.cn (Y.W.); Tel.: +20-111-668-1228 (M.F.H.); +86-771-322-4990 (Y.W.)

**Citation:** Hamza, M.F.; Goda, A.E.-S.; Ning, S.; Mira, H.I.; Abdel-Rahman, A.A.-H.; Wei, Y.; Fujita, T.; Amer, H.H.; Alotaibi, S.H.; Fouda, A. Photocatalytic Efficacy of Heterocyclic Base Grafted Chitosan Magnetite Nanoparticles on Sorption of Pb(II); Application on Mining Effluent. *Catalysts* **2022**, *12*, 330. <https://doi.org/10.3390/catal12030330>

Academic Editor: María Victoria and López Ramón

Received: 18 February 2022

Accepted: 9 March 2022

Published: 14 March 2022

**Publisher's Note:** MDPI stays neutral with regard to jurisdictional claims in published maps and institutional affiliations.

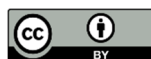

**Copyright:** © 2022 by the authors. Submitted for possible open access publication under the terms and conditions of the Creative Commons Attribution (CC BY) license (<https://creativecommons.org/licenses/by/4.0/>).

**Table S1.** Diffraction patterns of the XRD peaks and the matched reference file.

| Pos. [°2Th.] | d-spacing [Å] | Rel. Int. [%] | Matched by  |
|--------------|---------------|---------------|-------------|
| 18.2700      | 4.85595       | 17.16         | 01-077-1545 |
| 30.2500      | 2.95462       | 17.16         | 01-077-1545 |
| 35.5474      | 2.52552       | 100.00        | 01-077-1545 |
| 37.3469      | 2.40787       | 17.16         | 01-077-1545 |
| 43.1967      | 2.09438       | 35.60         | 01-077-1545 |
| 57.0873      | 1.61342       | 33.87         | 01-077-1545 |
| 62.6265      | 1.48338       | 47.67         | 01-077-1545 |
| 81.4031      | 1.18220       | 17.83         | 01-077-1545 |
| 82.2235      | 1.17150       | 14.80         | 01-077-1545 |

**Table S2.** Elemental analysis of MCc and MCa-ATA sorbents.

|         |      | C     | N    | H     | O     | Fe    | S    |
|---------|------|-------|------|-------|-------|-------|------|
| MCc     | %    | 28.15 | 4.92 | 3.99  | 32.18 | 30.76 | 0    |
|         | mmol | 23.44 | 3.51 | 39.58 | 20.11 | 5.51  | 0    |
| MCa-ATA | %    | 26.44 | 6.48 | 4.1   | 33.03 | 27.1  | 2.85 |
|         | mmol | 22.02 | 4.63 | 40.68 | 20.65 | 4.853 | 0.89 |

**Table S3.** Chemical composition of the ferruginous sandstone ore material.

| Major Oxides                   | Conc., (%) | Trace Elements | Conc. (ppm) |
|--------------------------------|------------|----------------|-------------|
| SiO <sub>2</sub>               | 40.0       | U              | 2600        |
| TiO <sub>2</sub>               | 0.33       | Ni             | 138         |
| Al <sub>2</sub> O <sub>3</sub> | 3.40       | Pb             | 900         |
| Fe <sub>2</sub> O <sub>3</sub> | 26.0       | B              | 200         |
| CaO                            | 1.20       | Cu             | 165         |
| MgO                            | 3.20       | V              | 150         |
| MnO                            | 1.80       | Zr             | 180         |
| Na <sub>2</sub> O              | 0.90       | Th             | 60          |
| K <sub>2</sub> O               | 0.70       |                |             |
| P <sub>2</sub> O <sub>5</sub>  | 3.60       |                |             |
| RE <sub>2</sub> O <sub>3</sub> | 12.6       |                |             |
| L.O.I *                        | 4.06       |                |             |
| Total                          | 97.79      |                |             |

L.O.I \*: loss of ignition.

**Table S4.** Chemical composition of the the ore leachates and the produced effluents after extraction treatments.

| Ore leachate |                          | After loading/ pH control and PPT |            |
|--------------|--------------------------|-----------------------------------|------------|
| Metal ion    | Conc. mg g <sup>-1</sup> | Conc. mg g <sup>-1</sup>          | removing % |
| Si(IV)       | 128                      | 92.26                             | 27.921875  |
| Al(III)      | 8170                     | 98.7                              | 98.7919217 |
| Fe(III)      | 20800                    | 60.54                             | 99.7089423 |
| Ca(II)       | 1170                     | 499.3                             | 57.3247863 |
| Mn(II)       | 980                      | 504.8                             | 48.4897959 |
| Ni(II)       | 60.8                     | 36.59                             | 39.8190789 |
| Cu(II)       | 31.5                     | 10.1                              | 67.9365079 |
| REE(III)     | 8700                     | 48.95                             | 99.4373563 |
| U(VI)        | 200                      | 18.1                              | 90.95      |
| Pb(II)       | 80.31                    | 38.97                             | 51.4755323 |

**Table S5a.** Reminder on equations used for modeling uptake kinetics [94–96].

| Model | Equation                                                                                                                                                                                                                                                                                | Parameters                                                                                                                                               | Ref. |
|-------|-----------------------------------------------------------------------------------------------------------------------------------------------------------------------------------------------------------------------------------------------------------------------------------------|----------------------------------------------------------------------------------------------------------------------------------------------------------|------|
| PFORE | $q(t) = q_{eq,1}(1 - e^{-k_1 t})$                                                                                                                                                                                                                                                       | $q_{eq,1}$ (mmol g <sup>-1</sup> ): sorption capacity at equilibrium<br>$k_1$ (min <sup>-1</sup> ): apparent rate constant of PFORE                      | [96] |
| PSORE | $q(t) = \frac{q_{eq,2}^2 k_2 t}{1 + k_2 q_{eq,2} t}$                                                                                                                                                                                                                                    | $q_{eq,2}$ (mmol g <sup>-1</sup> ): sorption capacity at equilibrium<br>$k_2$ (g mmol <sup>-1</sup> min <sup>-1</sup> ): apparent rate constant of PSORE | [96] |
| RIDE  | $\frac{q(t)}{q_{eq}} = 1 - \sum_{n=1}^{\infty} \frac{6\alpha(\alpha+1)\exp\left(\frac{-D_e q_n^2}{r^2} t\right)}{9 + 9\alpha + q_n^2 \alpha^2}$<br>With $q_n$ being the non-zero roots of<br>$\tan q_n = \frac{3 q_n}{3 + \alpha q_n^2}$ and $\frac{m q}{V C_0} = \frac{1}{1 + \alpha}$ | $D_e$ (m <sup>2</sup> min <sup>-1</sup> ): Effective diffusivity coefficient                                                                             | [94] |

(m (g): mass of sorbent; V (L): volume of solution;  $C_0$  (mmol L<sup>-1</sup>): initial concentration of the solution).

**Table S5b.** Reminder on equations used for modeling sorption isotherms [95,97,98].

| Model      | Equation                                                             | Parameters                                                                                                                             | Ref. |
|------------|----------------------------------------------------------------------|----------------------------------------------------------------------------------------------------------------------------------------|------|
| Langmuir   | $q_{eq} = \frac{q_{m,L} C_{eq}}{1 + b_L C_{eq}}$                     | $q_{m,L}$ (mmol g <sup>-1</sup> ): Sorption capacity at saturation of monolayer<br>$b_L$ (L mmol <sup>-1</sup> ): Affinity coefficient | [95] |
| Freundlich | $q_{eq} = k_F C_{eq}^{1/n_F}$                                        | $k_F$ and $n_F$ : empirical parameters of Freundlich equation                                                                          | [95] |
| Sips       | $q_{eq} = \frac{q_{m,s} b_s C_{eq}^{1/n_s}}{1 + b_s C_{eq}^{1/n_s}}$ | $q_{m,L}$ , $b_s$ and $n_s$ : empirical parameters of Sips equation (based on Langmuir and Freundlich equations)                       | [95] |
| Temkin     | $q_{eq} = \frac{R T}{b_T} \ln(A_T C_{eq})$                           | $b_T$ : J kg mol <sup>-2</sup> , Temkin isotherm constant<br>$A_T$ : L mol <sup>-1</sup> , Temkin isotherm equilibrium constant        | [98] |

Akaike Information Criterion, AIC [99]:

$$AIC = N \ln \left( \frac{\sum_{i=0}^N (y_{i,exp.} - y_{i,model})^2}{N} \right) + 2N_p + \frac{2N_p(N_p + 1)}{N - N_p - 1}$$

where N is the number of experimental points,  $N_p$  the number of model parameters,  $y_{i,exp.}$  and  $y_{i,model}$  the experimental and calculated values of the tested variable.

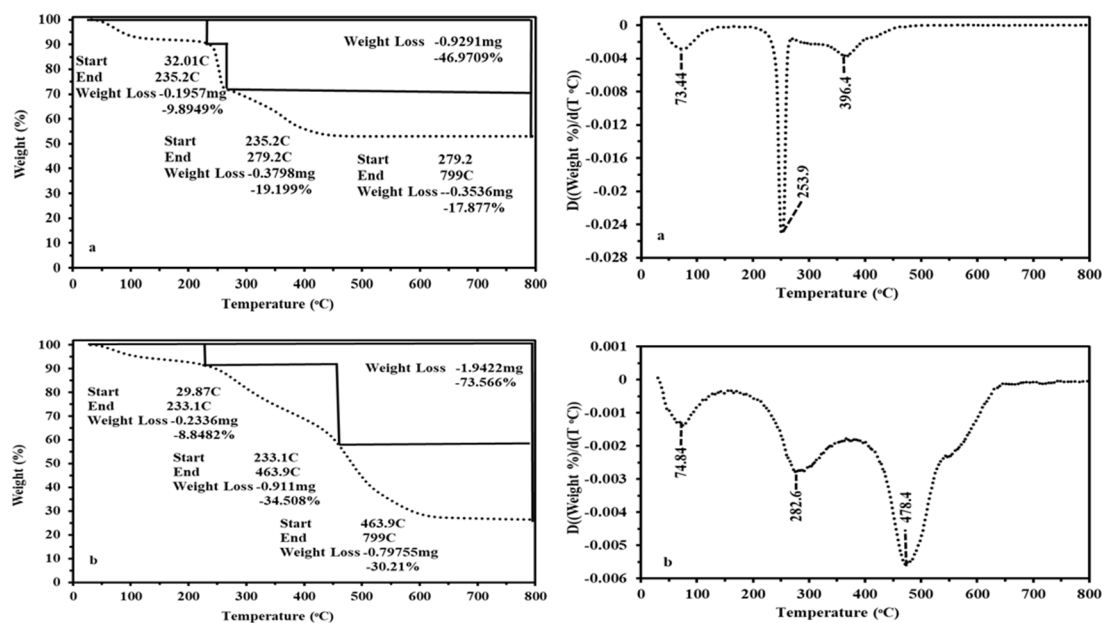

Figure S1. TGA and Dr-TGA of MCc (a) and MCa-ATA (b).

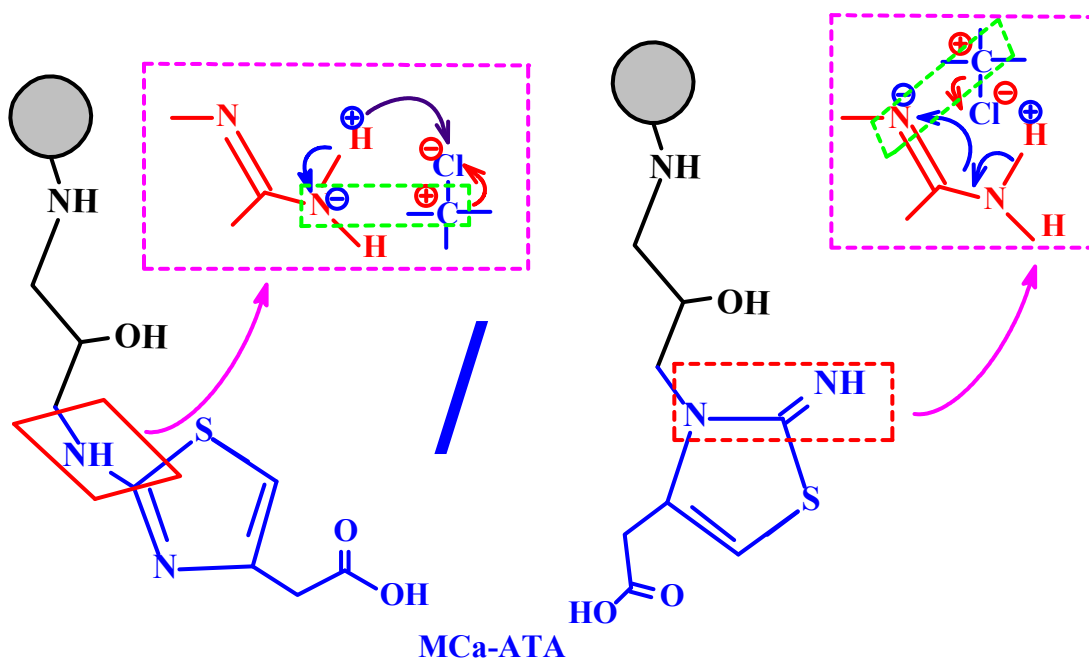

Figure S2. Tautomerization of the functionalized sorbent at a mild pH conditions.

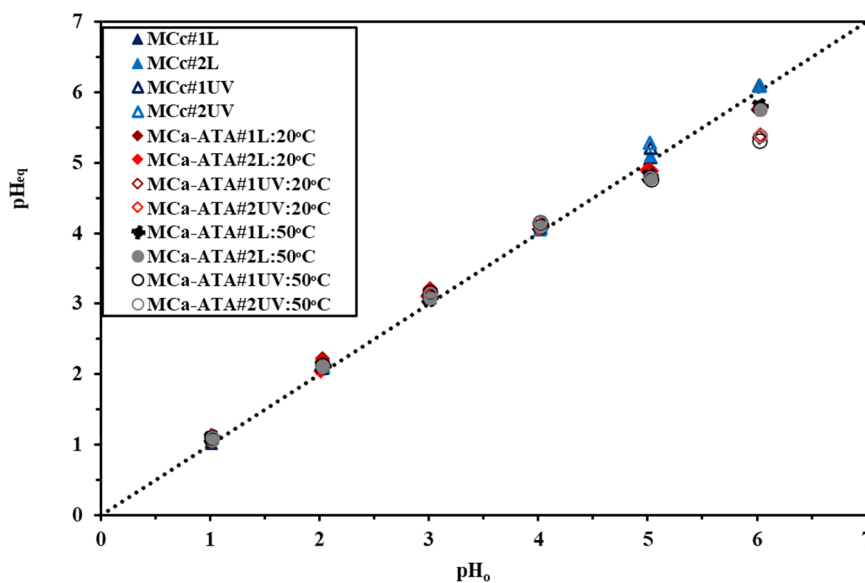

Figure S3. pH variation of MCc and MCa-ATA at 20 and 50 °C under light and UV effect.

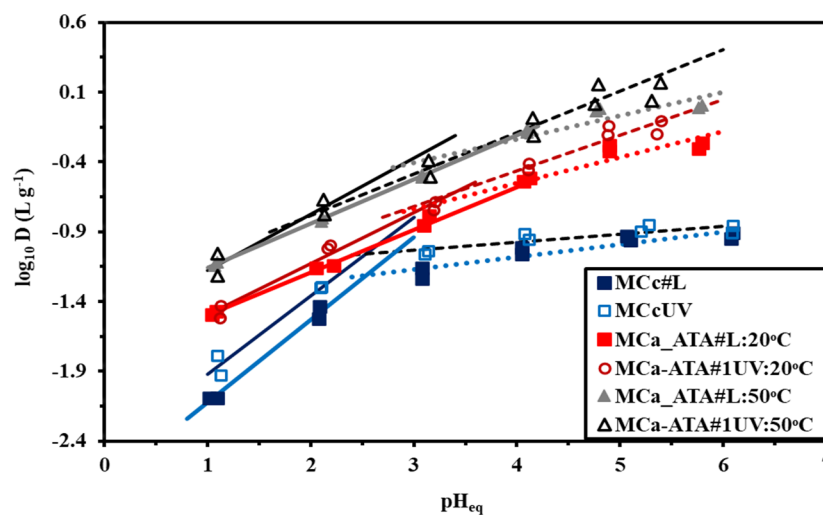

Figure S4. The data collected from plotting of the  $\log_{10}D$  and the equilibrium pH.

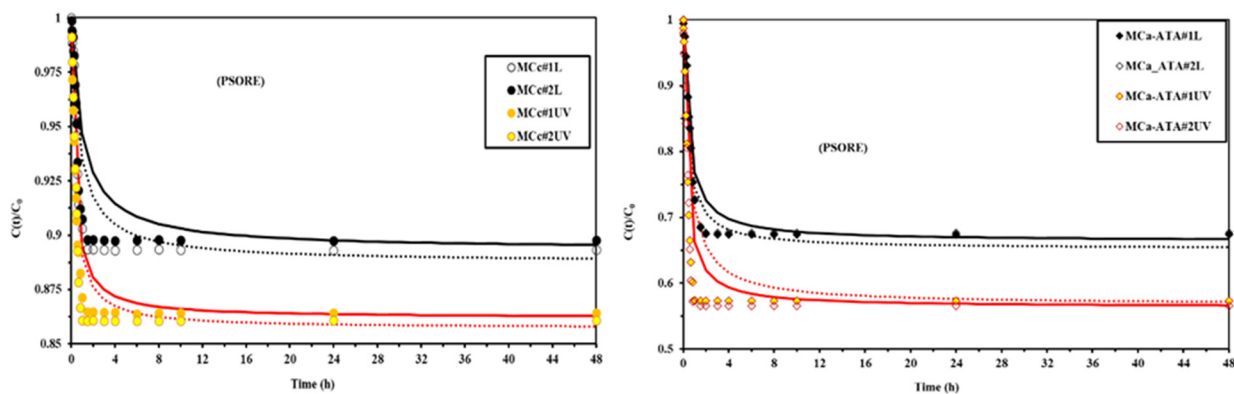

Figure S5. Sorption kinetics of MCc and MCa-ATA for the PSORE at light and UV effect.

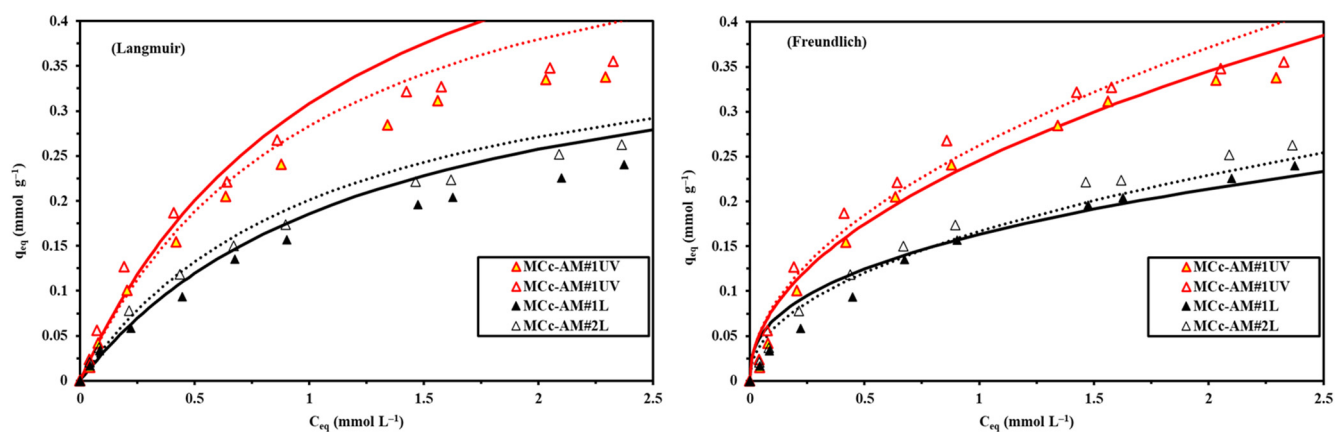

Figure S6. Sorption Isotherms (Langmuir and Freundlich) models of the MCc sorbent at light and

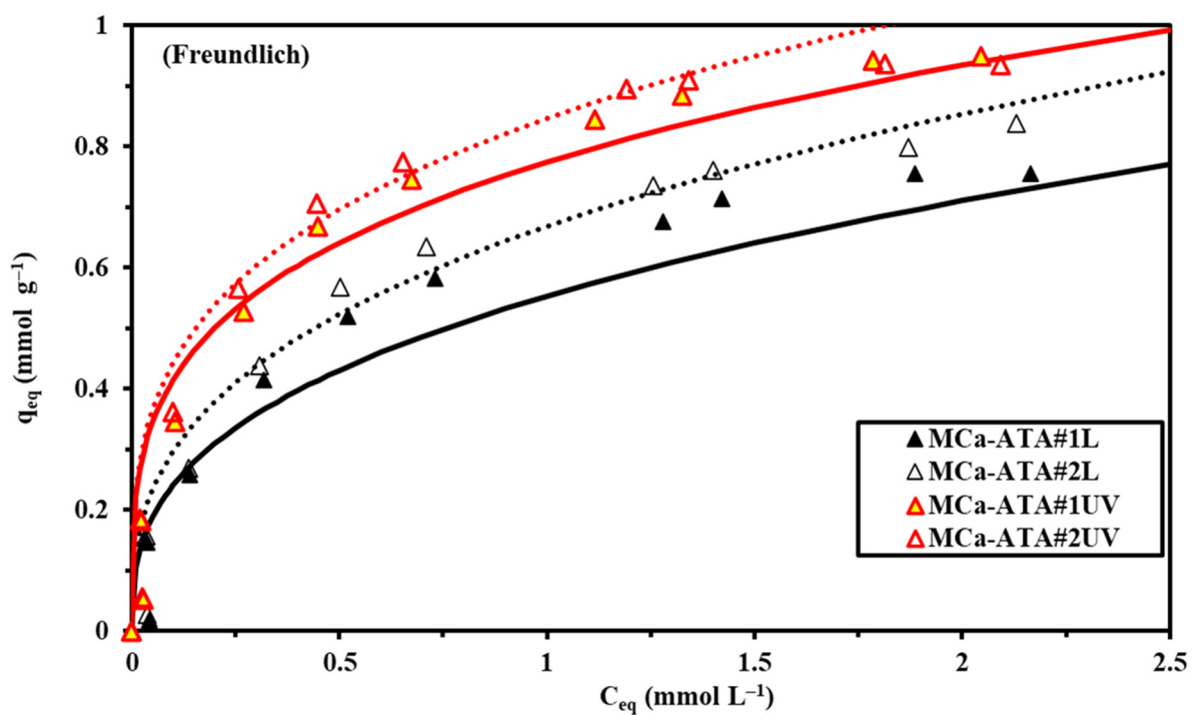

Figure S7. Sorption Isotherms (Freundlich) model of the MCa-ATA sorbent at light and UV.

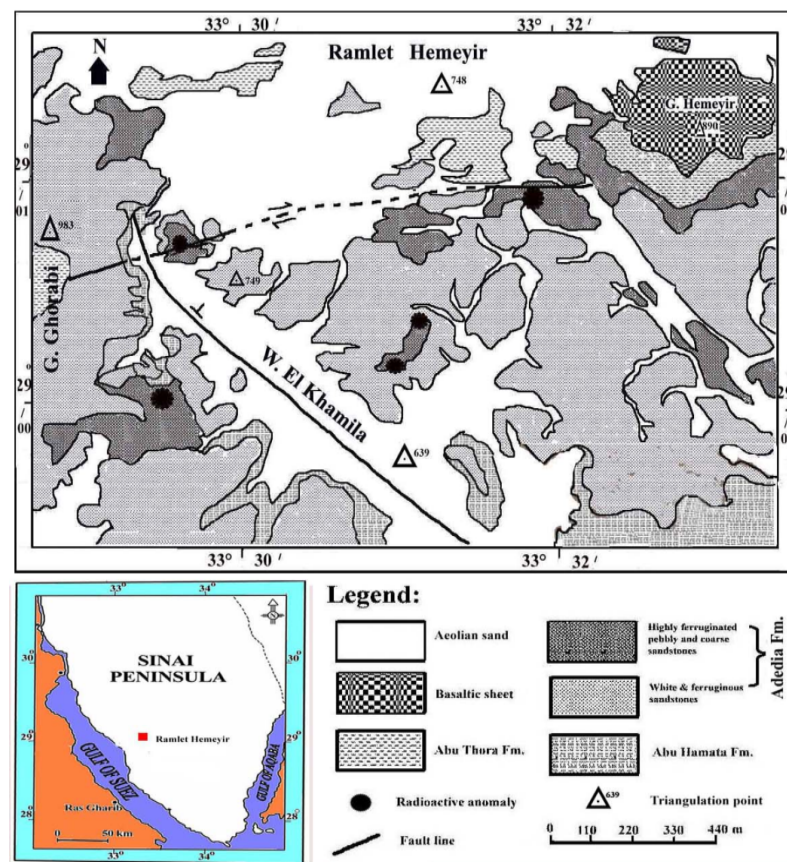

Figure S8. Geological map of the studied area.

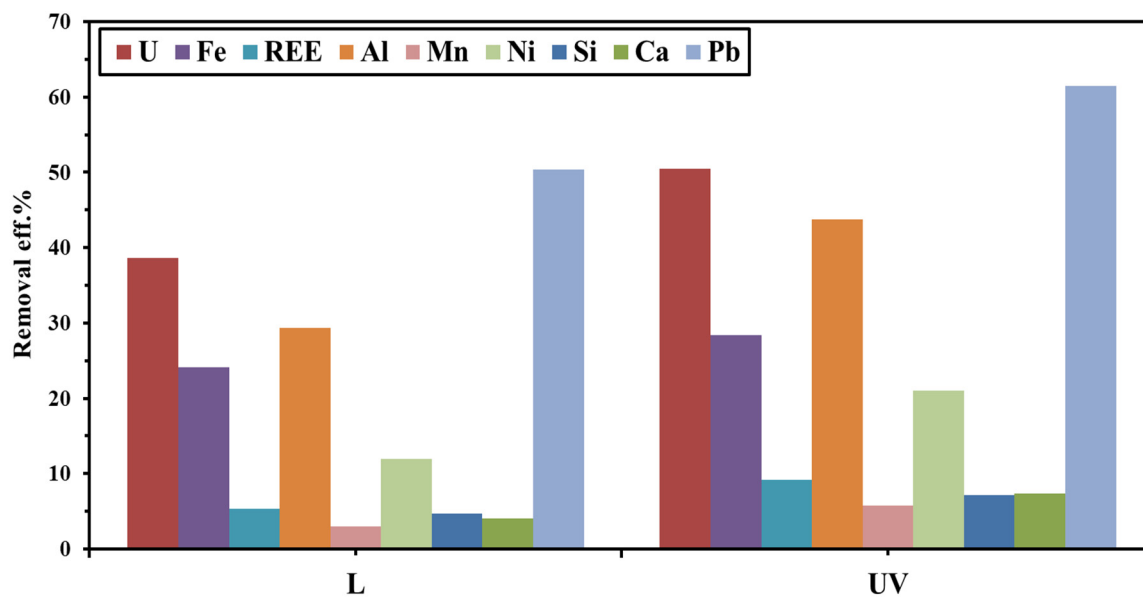

Figure S9. Removal efficiency % of metal ions in the ore effluent after treatment with MCa-ATA under light and UV conditions.
